# Supplementary material for: Dual-encapsulation of octadecanol in thermal/electric conductor for enhanced thermoconductivity and efficient energy storage
Source: Royal Society of Chemistry journal article supplement (doi:10.1039/c6qm00381h), 2017-01-01
Supplement: c6qm00381h1.pdf [file c6qm00381h1.pdf]

## Dual-Encapsulation of octadecanol in thermal/electric conductor for enhanced thermoconductivity and efficient energy storage

Wenhao Wu<sup>a</sup>, Ruimin Yao<sup>a</sup>, Xinyu Huang<sup>a</sup>, Renjie Chen<sup>a</sup>, Kai Li<sup>b</sup>, Song Gao<sup>a</sup> and Ruqiang Zou<sup>a\*</sup>

<sup>a</sup>Department of Materials Science and Engineering, College of Engineering, Peking University, Beijing 100871, China. Correspondence and requests for materials should be addressed to R. Z. (e-mail: [rzou@pku.edu.cn](mailto:rzou@pku.edu.cn)).

<sup>b</sup>Research Institute of Chemical Defence, Beijing, China

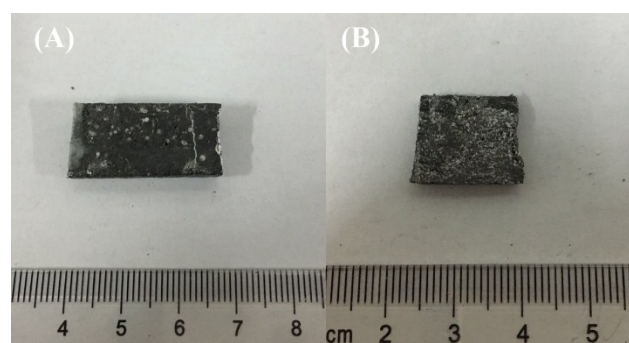

**Figure S1.** (a) The composite with repeated dipping was fully covered by WPU, (b) the composite dipped in the solution during the time was partially covered.

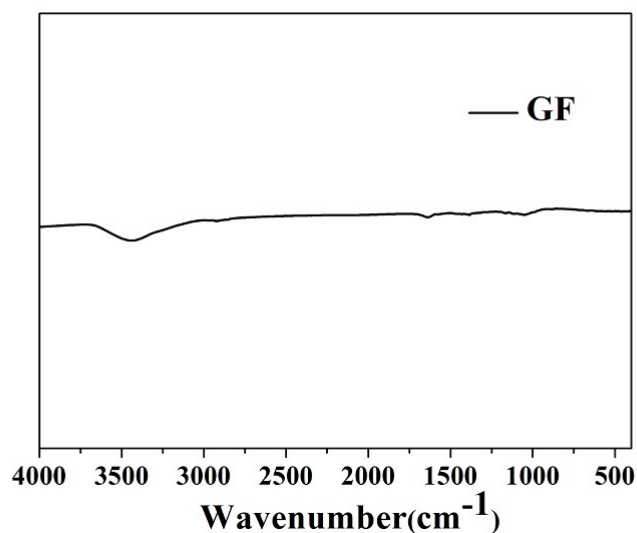

**Figure S2.** FT-IR of GF.

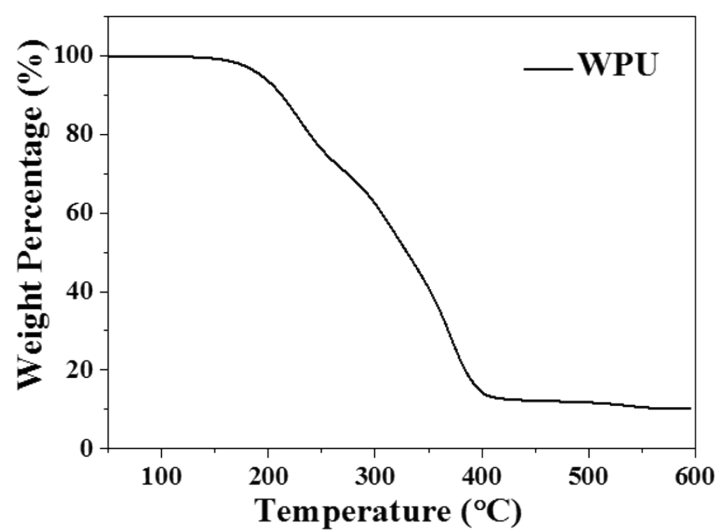

**Figure S3.** TGA curves of WPU.

**Table S1.** The electron conductivity of different samples

| Sample                      | GF  | OCT@GF (without) | OCT@GF (with) |
|-----------------------------|-----|------------------|---------------|
| Electric conductivity (S/m) | 669 | 537              | 15.6          |
